# Supplementary material for: Intensifying Electrochemical Activity of Ti3C2Tx MXene via Customized Interlayer Structure and Surface Chemistry
Source: MDPI journal article supplement (doi:10.3390/molecules28155776), 2023-07-31
Supplement: s1 [file s1]

Supporting Information

**Intensifying Electrochemical Activity of  $\text{Ti}_3\text{C}_2\text{T}_x$  MXene via  
Customized Interlayer Structure and Surface Chemistry**

**Minmin Hu, Lihong Chen, Yunqi Jing, Yuanyuan Zhu, Jun Dai, Alan Meng,  
Changlong Sun, Jin Jia\* and Zhenjiang Li\***

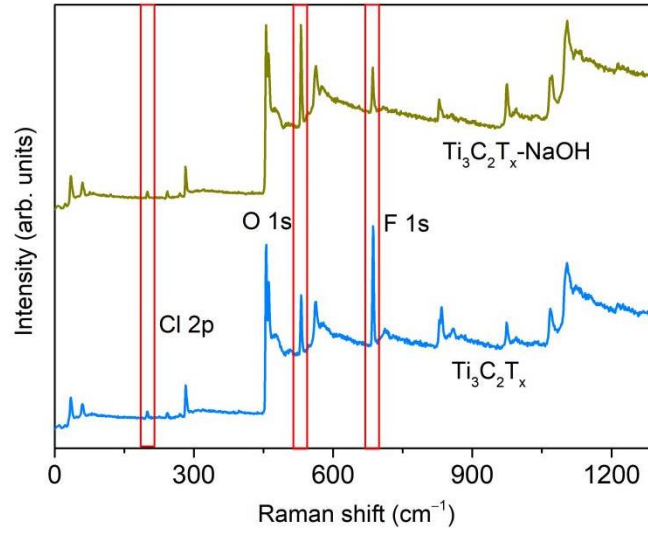

**Fig. S1.** XPS spectra for pristine  $\text{Ti}_3\text{C}_2\text{T}_x$  MXene and  $\text{Ti}_3\text{C}_2\text{T}_x\text{-NaOH}$ .  $\text{Ti}_3\text{C}_2\text{T}_x$  MXene prepared by etching  $\text{Ti}_3\text{AlC}_2$  with  $\text{HCl-LiF}$  mixture were terminated with O-containing, -F and -Cl groups. The content of -Cl group in pristine MXene and the change of the -Cl group content after NaOH treatment is negligible.

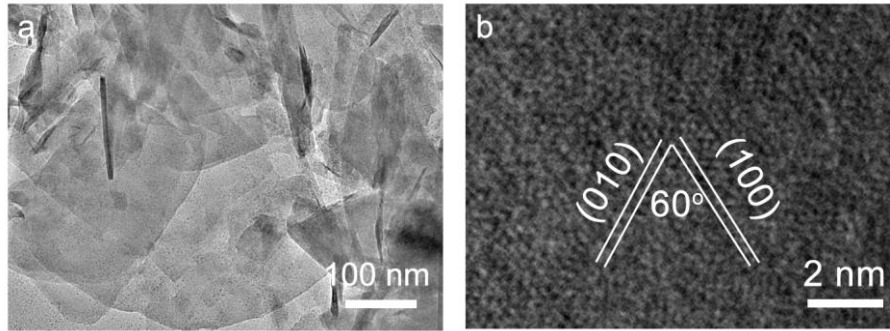

**Fig. S2.** (a) TEM image and (b) high-resolution TEM image of  $\text{Ti}_3\text{C}_2\text{T}_x\text{-NaOH-180}$  sample. Its sheet is very thin and disperses as individual layer or stack of several layers. The lattice spacings corresponding to (100) or (010) plane is measured about 0.27 nm. (100) and (010) planes show characteristic  $60^\circ$ .

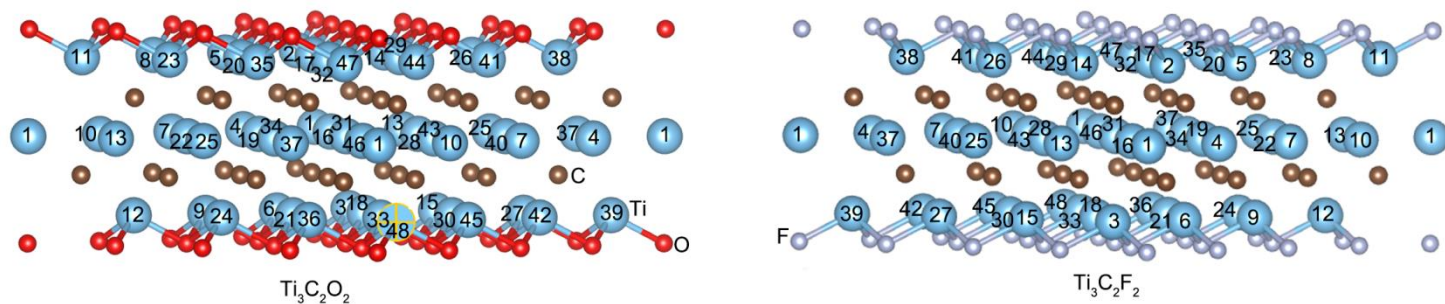

**Fig. S3.** The optimized structures and the positions of Ti atoms in  $\text{Ti}_3\text{C}_2\text{O}_2$  and  $\text{Ti}_3\text{C}_2\text{F}_2$ .

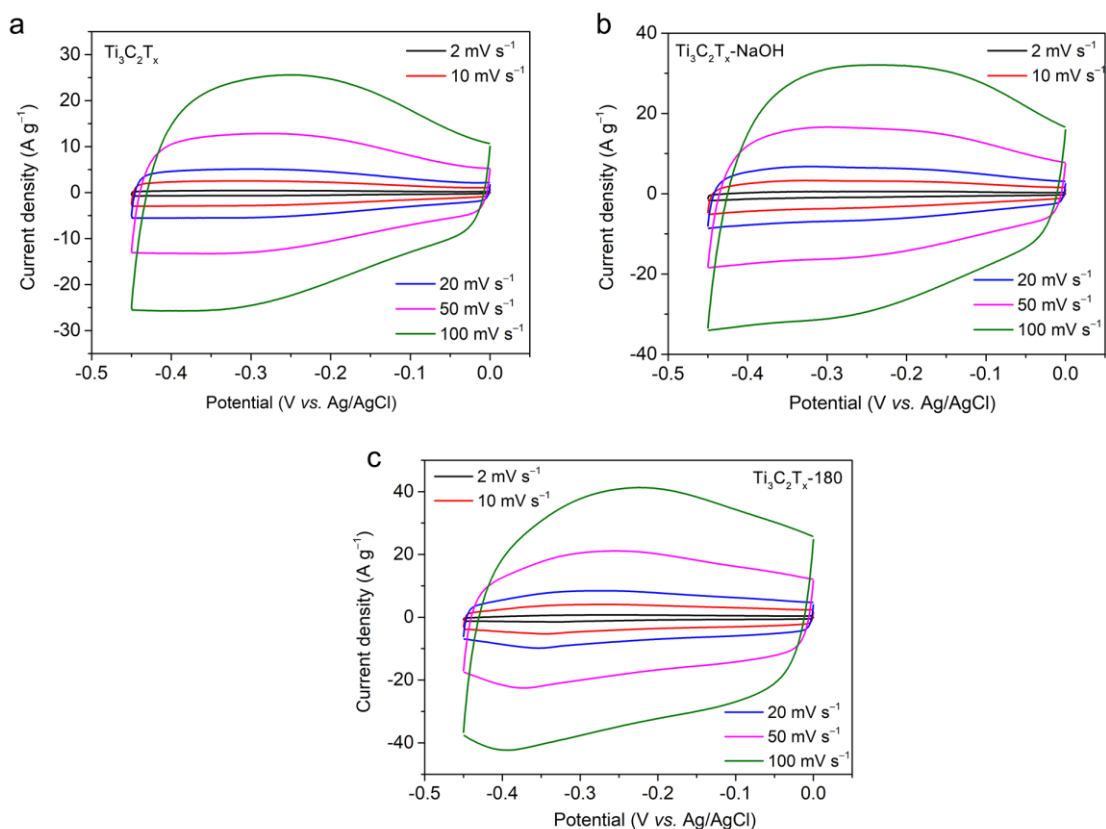

**Fig. S4.** CV curves at various scan rates for (a)  $\text{Ti}_3\text{C}_2\text{T}_x$ , (b)  $\text{Ti}_3\text{C}_2\text{T}_x\text{-NaOH}$ , (c)  $\text{Ti}_3\text{C}_2\text{T}_x\text{-180}$ .

**Tab. S1.** Bader charge analysis of Ti atoms in  $\text{Ti}_3\text{C}_2\text{O}_2$ .

| Position of Ti | Charge   | Position of Ti | Charge   |
|----------------|----------|----------------|----------|
| 1 <sup>a</sup> | 2.329739 | 25             | 2.314291 |
| 2              | 2.119117 | 26             | 2.076086 |
| 3              | 2.064528 | 27             | 2.071757 |
| 4              | 2.363035 | 28             | 2.347235 |
| 5              | 1.998048 | 29             | 2.923661 |
| 6              | 2.057172 | 30             | 2.066421 |
| 7              | 2.32702  | 31             | 2.283946 |
| 8              | 2.089243 | 32             | 2.840287 |
| 9              | 2.081644 | 33             | 2.028775 |
| 10             | 2.341395 | 34             | 2.340031 |
| 11             | 2.089979 | 35             | 2.080679 |
| 12             | 2.050423 | 36             | 2.062815 |
| 13             | 2.343072 | 37             | 2.344213 |
| 14             | 2.065652 | 38             | 2.112786 |
| 15             | 2.080376 | 39             | 2.090091 |
| 16             | 2.368623 | 40             | 2.354633 |
| 17             | 2.5938   | 41             | 2.055506 |
| 18             | 2.068876 | 42             | 2.081047 |
| 19             | 2.356807 | 43             | 2.370441 |
| 20             | 2.098028 | 44             | 2.105219 |
| 21             | 2.066398 | 45             | 2.063772 |
| 22             | 2.354323 | 46             | 2.379974 |
| 23             | 2.109878 | 47             | 2.106383 |
| 24             | 2.073624 | 48             | 2.060565 |

<sup>a</sup>number represents the positions of Ti atoms in  $\text{Ti}_3\text{C}_2\text{O}_2$  as shown in Figure S3

**Tab. S2.** Bader charge analysis of Ti atoms in  $\text{Ti}_3\text{C}_2\text{F}_2$ .

| Position of Ti | Charge   | Position of Ti | Charge   |
|----------------|----------|----------------|----------|
| 1 <sup>a</sup> | 2.5247   | 25             | 2.456103 |
| 2              | 2.418699 | 26             | 2.543717 |
| 3              | 2.586129 | 27             | 2.467842 |
| 4              | 2.3742   | 28             | 2.509465 |
| 5              | 2.438538 | 29             | 2.357361 |
| 6              | 2.387828 | 30             | 2.392464 |
| 7              | 2.414843 | 31             | 2.459569 |
| 8              | 2.318103 | 32             | 2.523248 |
| 9              | 2.796821 | 33             | 2.448507 |
| 10             | 2.472359 | 34             | 2.433237 |
| 11             | 2.343022 | 35             | 2.460292 |
| 12             | 2.522362 | 36             | 2.525133 |
| 13             | 2.623113 | 37             | 2.460048 |
| 14             | 2.51442  | 38             | 2.392856 |
| 15             | 2.597759 | 39             | 2.565084 |
| 16             | 2.614421 | 40             | 2.494663 |
| 17             | 2.557359 | 41             | 2.394128 |
| 18             | 2.325047 | 42             | 2.397052 |
| 19             | 2.861309 | 43             | 2.729333 |
| 20             | 2.344036 | 44             | 2.368331 |
| 21             | 2.436604 | 45             | 2.387668 |
| 22             | 2.504105 | 46             | 2.475112 |
| 23             | 2.507641 | 47             | 2.491145 |
| 24             | 2.431864 | 48             | 2.534686 |

<sup>a</sup>number represents the positions of Ti atoms in  $\text{Ti}_3\text{C}_2\text{F}_2$  as shown in Figure S3

**Tab. S3.** Comparison of electrochemical performance between  $\text{Ti}_3\text{C}_2\text{T}_x\text{-NaOH-180}$  and the previously reported  $\text{Ti}_3\text{C}_2\text{T}_x$  MXene based electrodes

| Electrode material                                               | Electrolyte                                   | Capacitive performance                          | Refs      |
|------------------------------------------------------------------|-----------------------------------------------|-------------------------------------------------|-----------|
| $\text{Ti}_3\text{C}_2\text{T}_x\text{-NaOH-180}$                | 1 mol $\text{L}^{-1}$ $\text{H}_2\text{SO}_4$ | 543 $\text{F g}^{-1}$ at 2 $\text{mV s}^{-1}$   | This work |
| $\text{Ti}_3\text{C}_2\text{T}_x\text{-Ni}$                      | 3 mol $\text{L}^{-1}$ $\text{H}_2\text{SO}_4$ | 369 $\text{F g}^{-1}$ at 2 $\text{mV s}^{-1}$   | [1]       |
| $\text{P-Ti}_3\text{C}_2\text{T}_x$                              | 1 mol $\text{L}^{-1}$ $\text{H}_2\text{SO}_4$ | 520 $\text{F g}^{-1}$ at 2 $\text{mV s}^{-1}$   | [2]       |
| $\text{Ti}_3\text{C}_2\text{T}_x\text{-K}_2\text{SO}_4\text{-C}$ | 1 mol $\text{L}^{-1}$ $\text{H}_2\text{SO}_4$ | 380 $\text{F g}^{-1}$ at 2 $\text{mV s}^{-1}$   | [3]       |
| $\text{P-Ti}_3\text{C}_2\text{T}_x$                              | 3 mol $\text{L}^{-1}$ $\text{H}_2\text{SO}_4$ | 448 $\text{F g}^{-1}$ at 1 $\text{A g}^{-1}$    | [4]       |
| $\text{N-Ti}_3\text{C}_2\text{T}_x$ film                         | 1 mol $\text{L}^{-1}$ $\text{H}_2\text{SO}_4$ | 340 $\text{F g}^{-1}$ at 2 $\text{mV s}^{-1}$   | [5]       |
| $\text{N-Ti}_3\text{C}_2\text{T}_x\text{-300}$                   | 3 mol $\text{L}^{-1}$ $\text{H}_2\text{SO}_4$ | 415.0 $\text{F g}^{-1}$ at 2 $\text{mV s}^{-1}$ | [6]       |
| N-butyllithium-treated $\text{Ti}_3\text{C}_2\text{T}_x$         | 1 mol $\text{L}^{-1}$ $\text{H}_2\text{SO}_4$ | 523 $\text{F g}^{-1}$ at 2 $\text{mV s}^{-1}$   | [7]       |
| $\text{N-Ti}_3\text{C}_2\text{T}_x\text{-200}$                   | 1 mol $\text{L}^{-1}$ $\text{H}_2\text{SO}_4$ | 192 $\text{F g}^{-1}$ at 1 $\text{mV s}^{-1}$   | [8]       |
| 400-KOH- $\text{Ti}_3\text{C}_2\text{T}_x$                       | 1 mol $\text{L}^{-1}$ $\text{H}_2\text{SO}_4$ | 517 $\text{F g}^{-1}$ at 1 $\text{mV s}^{-1}$   | [9]       |
| $\text{Ti}_3\text{C}_2\text{T}_x$ hydrogel electrode             | 3 mol $\text{L}^{-1}$ $\text{H}_2\text{SO}_4$ | 380 $\text{F g}^{-1}$ at 2 $\text{mV s}^{-1}$   | [10]      |
| Macroporous $\text{Ti}_3\text{C}_2\text{T}_x$ electrode          | 3 mol $\text{L}^{-1}$ $\text{H}_2\text{SO}_4$ | 310 $\text{F g}^{-1}$ at 10 $\text{mV s}^{-1}$  | [10]      |
| d- $\text{Ti}_3\text{C}_2\text{T}_x$                             | 1 mol $\text{L}^{-1}$ $\text{H}_2\text{SO}_4$ | 325 $\text{F g}^{-1}$ at 2 $\text{mV s}^{-1}$   | [11]      |
| $\text{Ti}_3\text{C}_2\text{T}_x$ ‘clay’                         | 1 mol $\text{L}^{-1}$ $\text{H}_2\text{SO}_4$ | 245 $\text{F g}^{-1}$ at 2 $\text{mV s}^{-1}$   | [12]      |

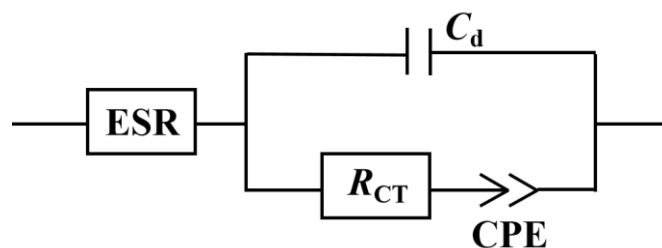

**Fig. S5.** Equivalent circuit adopted in the simulation of EIS spectra. ESR: equivalent series resistance ;  $C_d$ : electrical double layer capacitor;  $R_{ct}$ : charge transfer resistance; CPE: constant phase angle element.

**Tab. S4.** Simulation results of the EIS spectra (Figure 4e) of the prepared electrodes at open-circuit potentials ( $\sim 0$  V) vs. Ag/AgCl

| Elements                                          | $ESR/\text{ohm}$ | $C_d/\text{F}$ | $R_{ct}/\text{ohm}$ | CPE- $\alpha$ | CPE- $P$ |
|---------------------------------------------------|------------------|----------------|---------------------|---------------|----------|
| Pristine $\text{Ti}_3\text{C}_2\text{T}_x$        | 0.8845           | 0.0002913      | 0.2519              | 0.08075       | 0.8373   |
| $\text{Ti}_3\text{C}_2\text{T}_x\text{-NaOH}$     | 0.8483           | 0.000456       | 0.1414              | 0.1194        | 0.8392   |
| $\text{Ti}_3\text{C}_2\text{T}_x\text{-180}$      | 0.6921           | 0.0004942      | 0.1628              | 0.1465        | 0.8359   |
| $\text{Ti}_3\text{C}_2\text{T}_x\text{-NaOH-180}$ | 0.6888           | 0.000441       | 0.1426              | 0.2712        | 0.7293   |

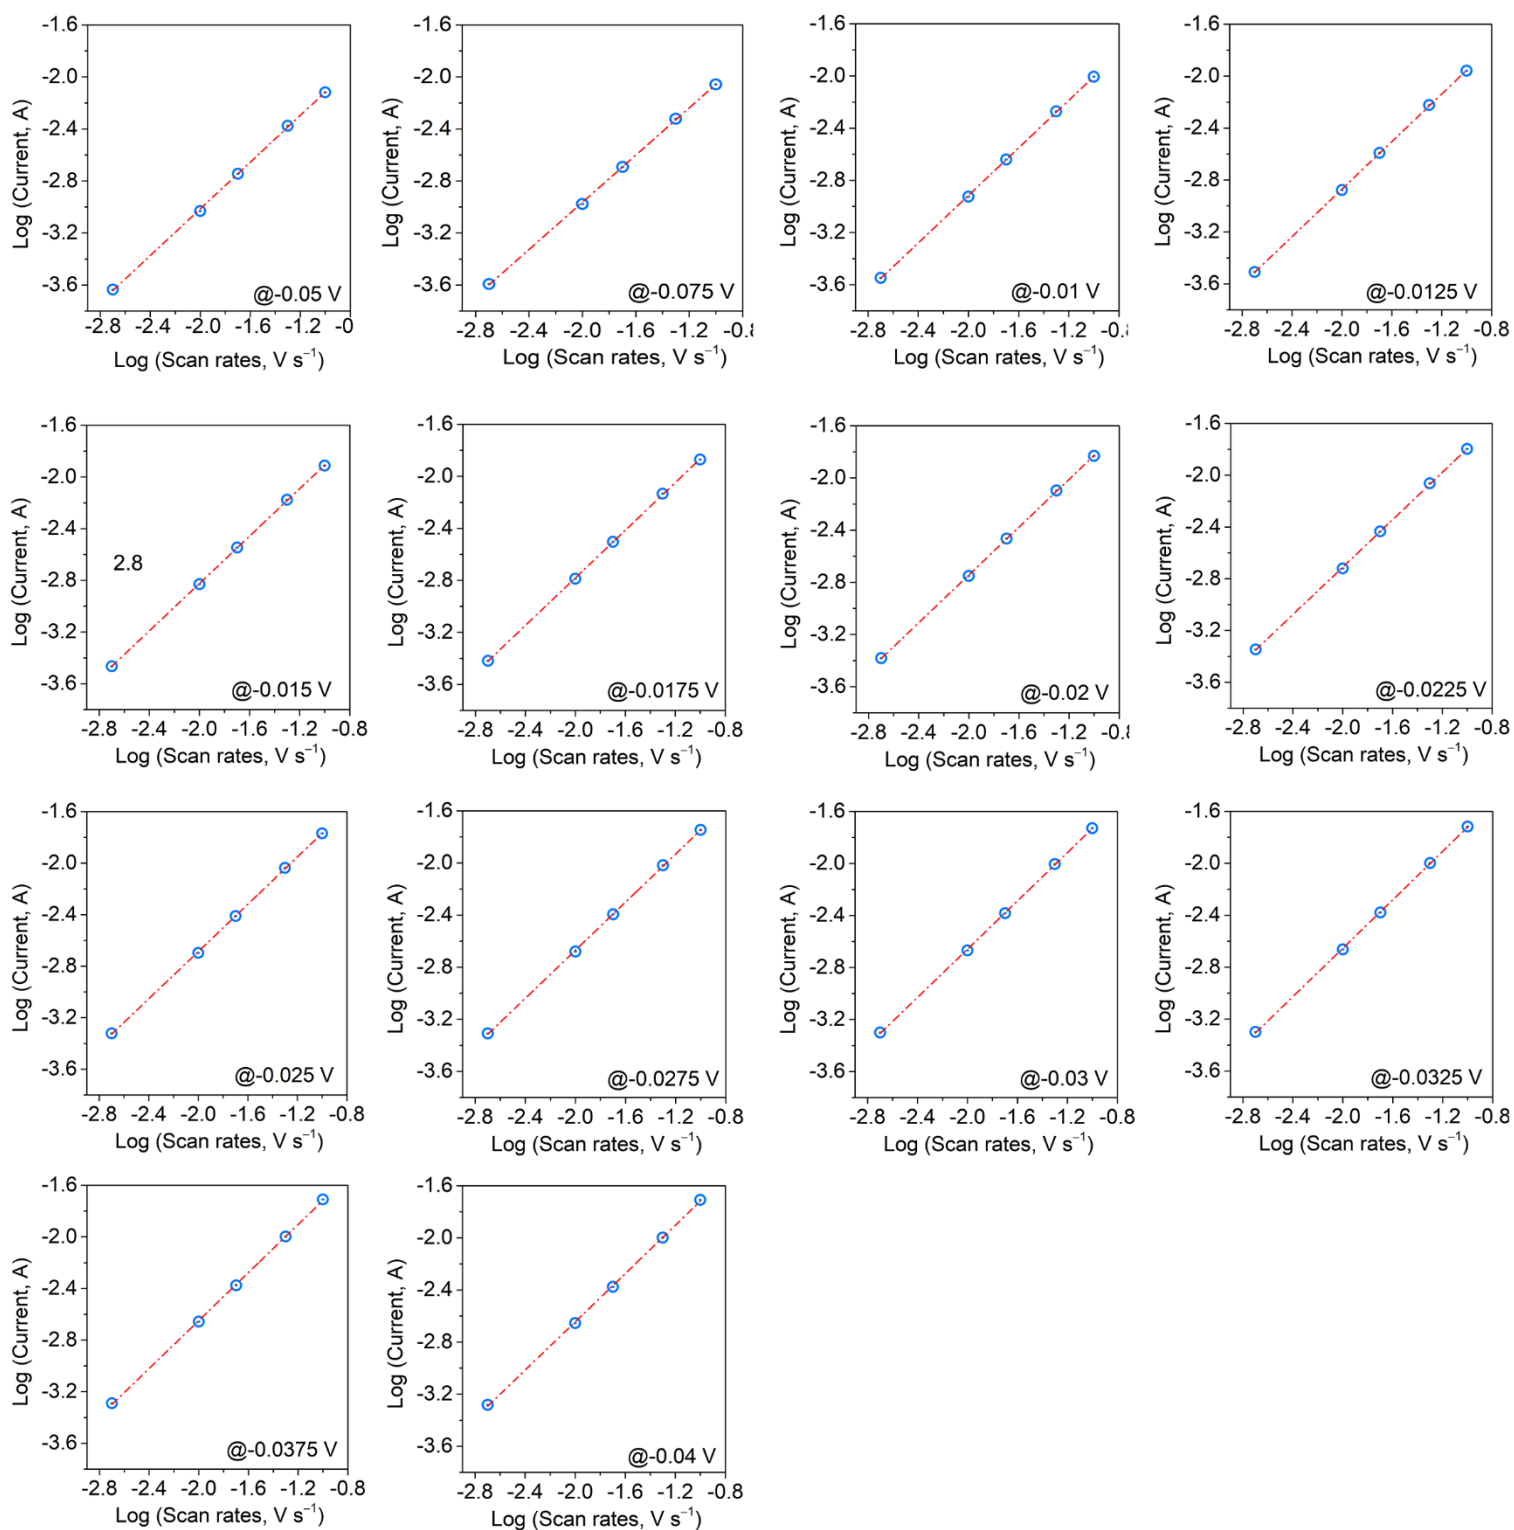

**Fig. S6.** The logarithm of the current ( $\log i$ ) at a certain potential on the discharge branch of the CV curve as a function of the logarithm of the scan rate ( $\log v$ ) for  $\text{Ti}_3\text{C}_2\text{T}_x$  electrode. The  $b$  value was obtained by estimating the slope of the curve.

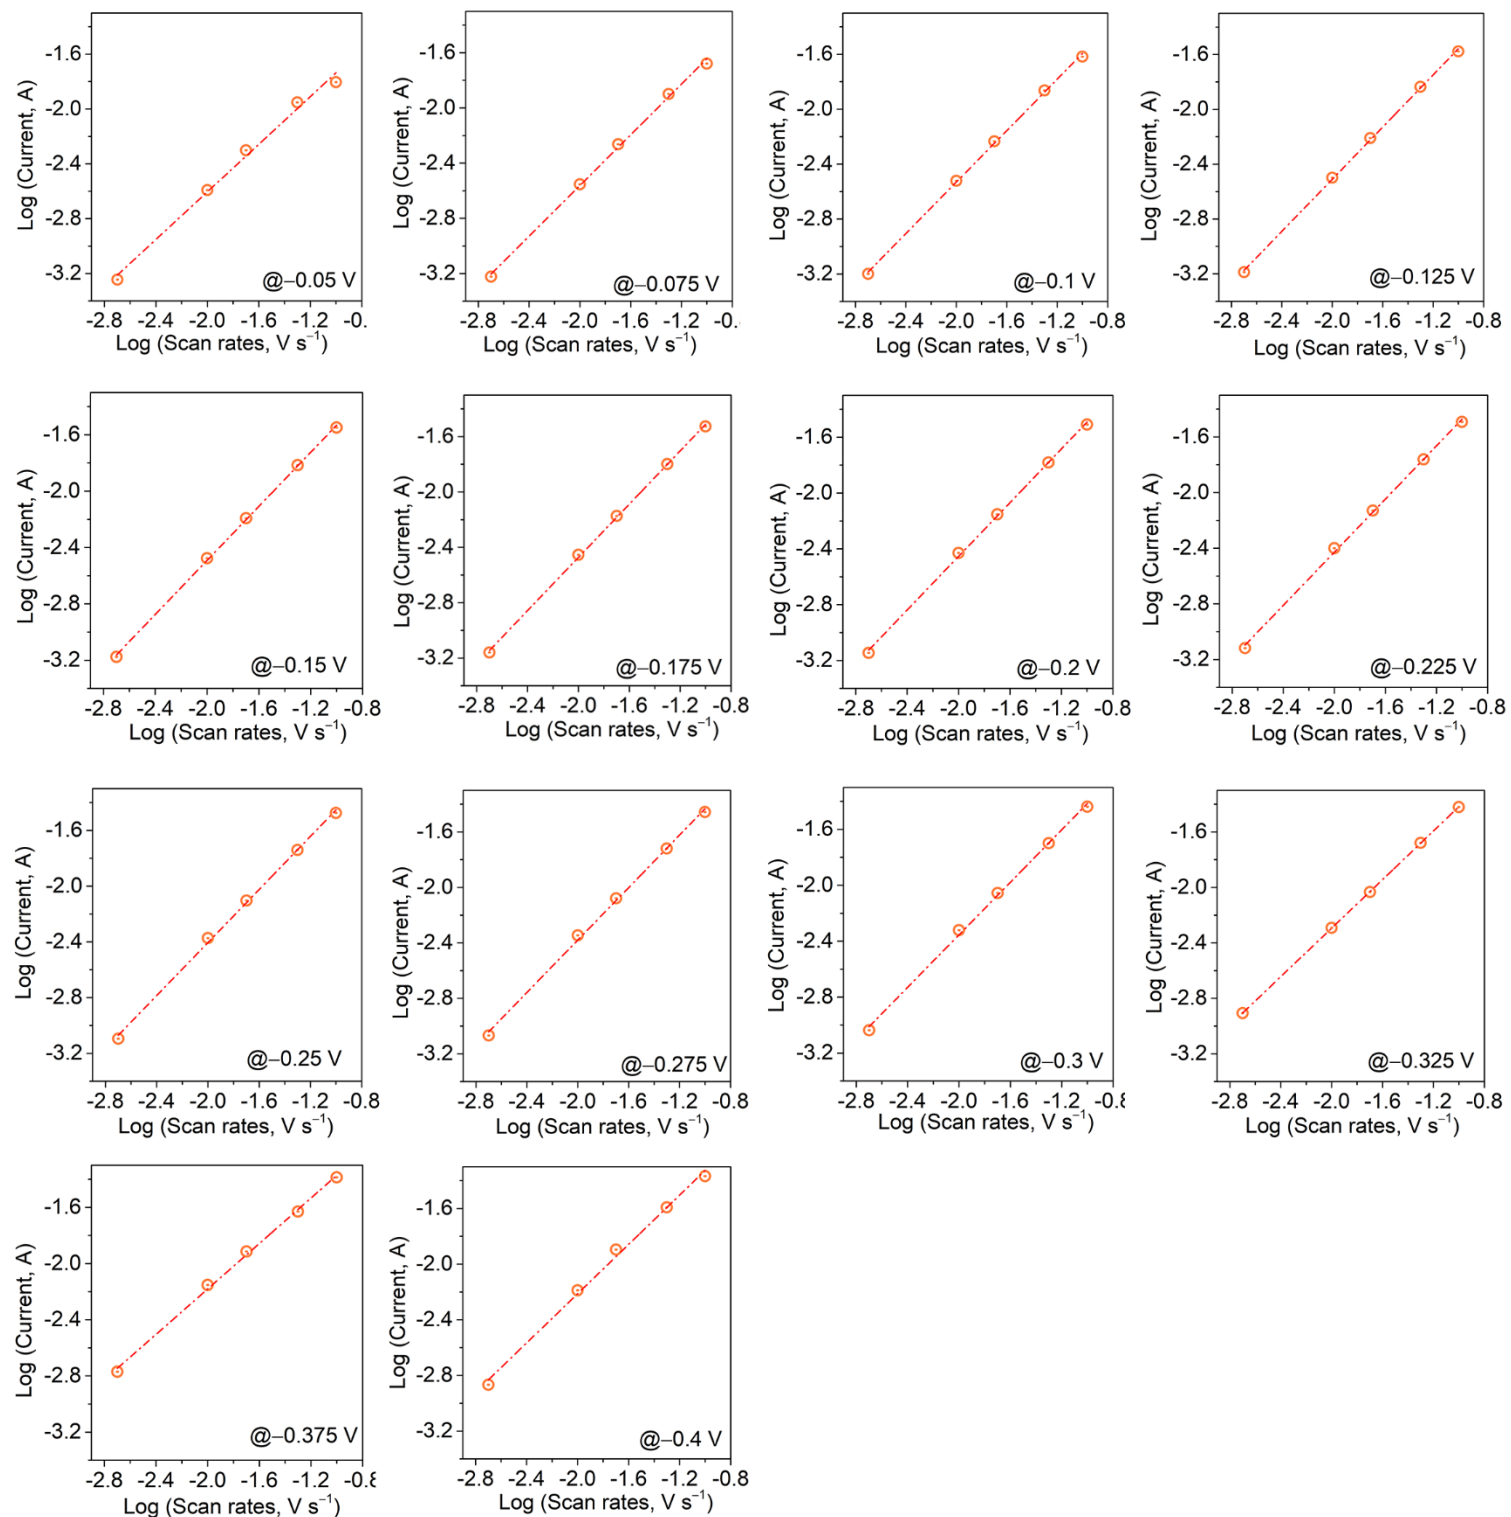

**Fig. S7.** The logarithm of the current ( $\log i$ ) at a certain potential on the discharge branch of the CV curve as a function of the logarithm of the scan rate ( $\log \nu$ ) for  $\text{Ti}_3\text{C}_2\text{T}_x\text{-NaOH-180}$  electrode. The  $b$  value was obtained by estimating the slope of the curve.

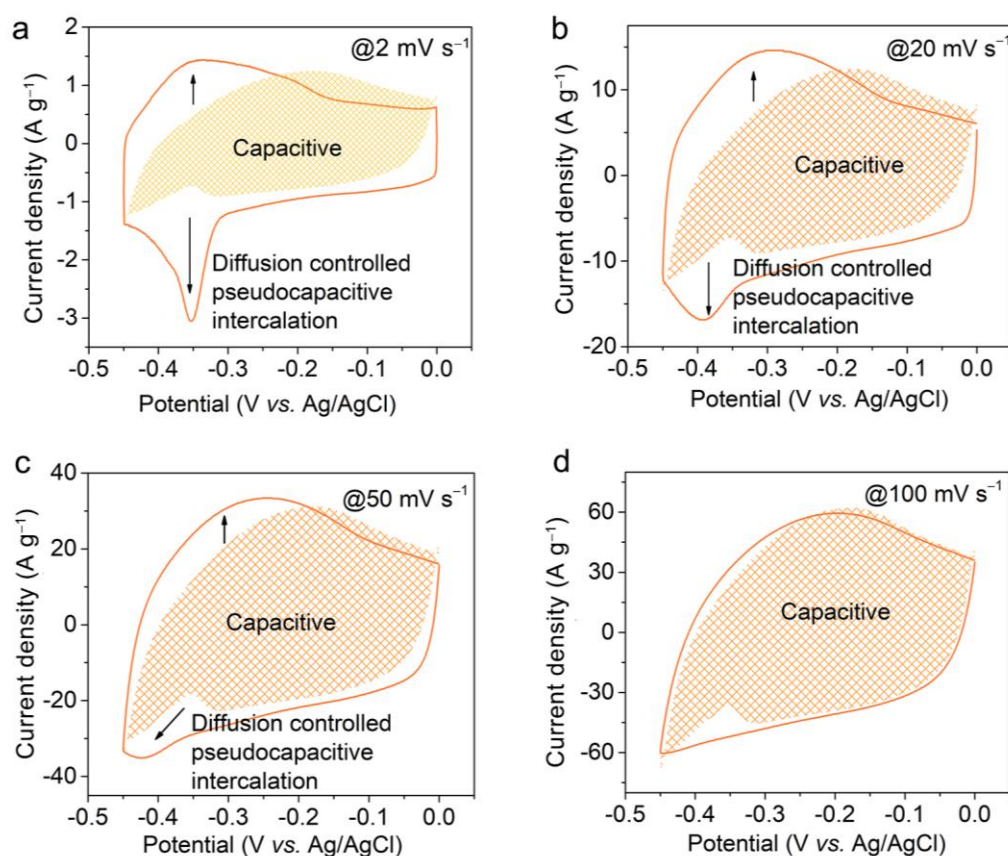

**Fig. S8.** CV profiles collected at (a)  $2 \text{ mV s}^{-1}$ , (b)  $20 \text{ mV s}^{-1}$ , (c)  $50 \text{ mV s}^{-1}$ , (d)  $100 \text{ mV s}^{-1}$  with hatched portions of the contribution of the capacitive limited processes for  $\text{Ti}_3\text{C}_2\text{T}_x\text{-NaOH-180}$  electrode. There is a noticeable and prevailing contribution of diffusion-limited processes to the total capacitance.

**Tab. S5.** Simulation results of the EIS spectra of the  $\text{Ti}_3\text{C}_2\text{T}_x\text{-NaOH-180}$  electrode collected at different potentials versus Ag/AgCl (Figure 5f)

| Elements | $R_s/\text{ohm}$ | $C_d/\text{F}$ | $R_{ct}/\text{ohm}$ | CPE- $P$ | CPE- $\alpha$ |
|----------|------------------|----------------|---------------------|----------|---------------|
| -0.12 V  | 0.8268           | 0.0002054      | 0.3943              | 0.204    | 0.8618        |
| -0.20 V  | 0.8351           | 0.0002485      | 0.3725              | 0.2162   | 0.8614        |
| -0.27 V  | 0.8485           | 0.000469       | 0.3561              | 0.2311   | 0.8698        |
| -0.34 V  | 0.9721           | 0.02024        | 0.4273              | 0.2838   | 0.856         |
| -0.4 V   | 0.8247           | 0.0004174      | 0.3252              | 0.3002   | 0.7621        |

**Tab. S6.** The main characteristics and capacitance of pristine  $\text{Ti}_3\text{C}_2\text{T}_x$  and the modified sample- $\text{Ti}_3\text{C}_2\text{T}_x\text{-NaOH-180}$

| Sample                                            | $c$ -lattice parameter | FWHM of (002) peak | Content of O-containing groups | Content of $\text{Ti}^{3+}$ or $\text{Ti}^{4+}$ | Contact angle of water | Capacitance at $2 \text{ mV s}^{-1}$ |
|---------------------------------------------------|------------------------|--------------------|--------------------------------|-------------------------------------------------|------------------------|--------------------------------------|
| $\text{Ti}_3\text{C}_2\text{T}_x$                 | 22.03 Å                | 0.634              | Low                            | Low                                             | 56°                    | 217 F g <sup>-1</sup>                |
| $\text{Ti}_3\text{C}_2\text{T}_x\text{-NaOH-180}$ | 24.00 Å                | 0.375              | High                           | High                                            | 12°                    | 543 F g <sup>-1</sup>                |

## References

- [1] Xu, H.; Fan, J.; Su, H.; Liu, C.; Chen, G.; Dall' Agnese, Y.; Gao, Y. Metal ion-induced porous MXene for all-solid-state flexible supercapacitors. *Nano Lett.* **2023**, *23*, 283–290.
- [2] Chen, L.; Bi, Y.; Jing, Y.; Dai, J.; Li, Z.; Sun, C.; Meng, A.; Xie, H.; Hu, M. Phosphorus doping strategy-induced synergistic modification of interlayer structure and chemical state in  $\text{Ti}_3\text{C}_2\text{T}_x$  toward enhancing capacitance. *Molecules* **2023**, *28*, 4892.
- [3] Li, Z.; Dai, J.; Li, Y.; Sun, C.; Meng, A.; Cheng, R.; Zhao, J.; Hu, M.; Wang, X. Intercalation-deintercalation design in MXenes for high performance supercapacitors. *Nano Res.* **2022**, *15*, 3213–3221.
- [4] Gupta, N.; Sahu, R. K.; Mishra, T.; Bhattacharya, P. Microwave-assisted rapid synthesis of titanium phosphate free phosphorus doped  $\text{Ti}_3\text{C}_2$  MXene with boosted pseudocapacitance. *J. Mater. Chem. A* **2022**, *10*, 15794–15810.
- [5] Zhang, T.; Xiao, J.; Li, L.; Zhao, J.; Gao, H. A high-performance supercapacitor electrode based on freestanding N-doped  $\text{Ti}_3\text{C}_2\text{T}_x$  film. *Ceram. Int.* **2020**, *46*, 21482–21488.
- [6] Tian, Y.; Que, W.; Luo, Y.; Yang, C.; Yin, X.; Kong, L. B. Surface nitrogen-modified 2D titanium carbide (MXene) with high energy density for aqueous supercapacitor applications. *J. Mater. Chem. A* **2019**, *7*, 5416–5425.
- [7] Chen, X.; Zhu, Y.; Zhang, M.; Sui, J.; Peng, W.; Li, Y.; Zhang, G.; Zhang, F.; Fan, X. N-butyllithium-treated  $\text{Ti}_3\text{C}_2\text{T}_x$  MXene with excellent pseudocapacitor performance. *ACS Nano* **2019**, *13*, 9449–9456.
- [8] Wen, Y.; Rufford, T. E.; Chen, X.; Li, N.; Lyu, M.; Dai L.; Wang, L. Nitrogen-doped  $\text{Ti}_3\text{C}_2\text{T}_x$  MXene electrodes for high-performance supercapacitors. *Nano Energy* **2017**, *38*, 368–376.
- [9] Li, J.; Yuan, X.; Lin, C.; Yang, Y.; Xu, L.; Du, X.; Xie, J.; Lin J.; Sun, J. Achieving high pseudocapacitance of 2D titanium carbide (MXene) by cation intercalation and surface modification. *Adv. Energy Mater.* **2017**, *7*, 1602725.
- [10] Lukatskaya, M. R.; Kota, S.; Lin, Z.; Zhao, M.; Shpigel, N.; Levi, M. D.; Halim, J.; Taberna, P. -L.; Barsoum, M. W.; Simon, P.; Gogotsi, Y. Ultra-high-rate pseudocapacitive energy storage in two-dimensional transition metal carbides. *Nat. Energy* **2017**, *2*, 17105.
- [11] Dall' Agnese, Y.; Lukatskaya, M. R.; Cook, K. M.; Taberna, P. -L.; Gogotsi, Y.; Simon, P. High capacitance of surface-modified 2D titanium carbide in acidic electrolyte. *Electrochem. Commun.* **2014**, *48*, 118–122.
- [12] Ghidui, M.; Lukatskaya, M. R.; Zhao, M. Q.; Gogotsi, Y.; Barsoum, M. W. Conductive two-dimensional titanium carbide ‘clay’ with high volumetric capacitance. *Nature* **2014**, *516*, 78–81.
